# Supplementary material for: Modulating FOXO3 transcriptional activity by small, DBD-binding molecules
Source: eLife journal article supplement (doi:10.7554/elife.48876), 2019-12-02

## Synthesis of S9 and S9ox

|                                                                           |   |
|---------------------------------------------------------------------------|---|
| Synthesis of S9 and S9ox                                                  | 1 |
| General                                                                   | 1 |
| Reaction scheme                                                           | 1 |
| Preparation of substrates and corresponding NMR spectra                   | 2 |
| Preparation of oxalate salt derived from S9 and corresponding NMR spectra | 9 |

### General

Chemicals and solvents were either purchased from commercial suppliers. For thin-layer chromatography (TLC), silica gel plates Merck 60 F254 were used and compounds were visualized by irradiation with UV light and/or by treatment with a solution ninhydrine followed by heating. Column chromatography was performed using silica gel Merck 60 (particle size 0.063-0.200 mm).  $^1\text{H}$ -NMR,  $^{13}\text{C}$ -NMR spectra were recorded on Bruker AVANCE III 400. Chemical shifts for protons are given in  $\delta$  relative to tetramethylsilane (TMS) and are referenced to residual protium in the NMR solvent (DMSO- $d_6$ :  $\delta = 2.50$  ppm, Methanol- $d_4$ :  $\delta = 4.87$  ppm). Chemical shifts for carbon are referenced to the carbon in NMR solvent (DMSO- $d_6$ :  $\delta = 39.52$  ppm, Methanol- $d_4$ :  $\delta = 49.00$  ppm). The coupling constants  $J$  are given in Hz. IR DRIFT spectras were recorded with Nicolet AVATAR 370 FT-IR in  $\text{cm}^{-1}$ . High-resolution mass spectras were recorded with LCQ Fleet spectrometer.

### Reaction scheme

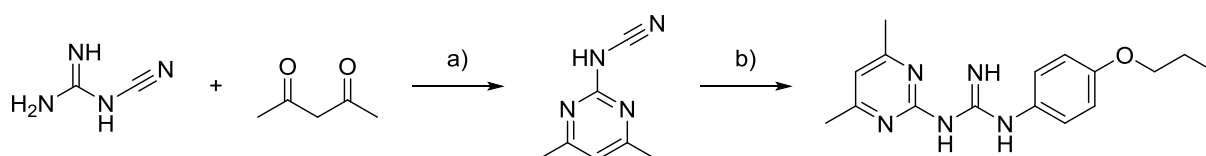

Scheme 1: Synthetic route to S9. Reagents and conditions: a) NaOH, H<sub>2</sub>O, reflux, 22% yield, b) 4-propoxyaniline, EtOH, reflux, 47% yield.

## Preparation of substrates

### *N*-(4,6-Dimethylpyrimidin-2-yl)cyanamide

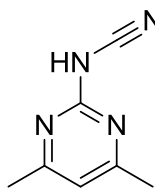

*N*-(4,6-Dimethylpyrimidin-2-yl)cyanamide was prepared according to previously reported procedure.<sup>1</sup>

Cyanoguanidine (5.0 g, 60 mmol), acetylacetone (9.0 g, 90 mmol) were added to a solution of NaOH (0.3M, 40 ml) and the reaction mixture was stirred under reflux 48 h. Then the mixture was cooled to 4 °C, solids were filtered and washed with minimal amount of water. Filtrate cake was recrystallized

from boiling ethanol (approx. 120 ml).

22% **yield**, white solid, **m.p.** = 228.7 °C, **<sup>1</sup>H-NMR**: (400 MHz, DMSO-*d*<sub>6</sub>)  $\delta$  = 12.58 (s, 1H), 6.63 (s, 1H), 2.31 (s, 6H). ppm, **<sup>13</sup>C-NMR**: (101 MHz, DMSO-*d*<sub>6</sub>)  $\delta$  = 166.8, 160.2 (2C), 115.8, 109.7, 21.9 (2C) ppm, **IR** (KBr)  $\nu$  = 3503, 3282, 3249, 3064, 3010, 2980, 2857, 2842, 2815, 2621, 2319, 2244, 2202, 2175, 2089, 1838, 1727, 1649, 1610, 1422, 1362, 1323, 1231, 1195, 1165, 1036, 1018, 985 cm<sup>-1</sup>, **HRMS** (ESI+) *m/z*: calcd. for C<sub>7</sub>H<sub>9</sub>N<sub>4</sub> [M+H]<sup>+</sup>: 149.0827, found: 149.0792.

### 1-(4,6-Dimethylpyrimidin-2-yl)-3-(4-propoxyphenyl)guanidine

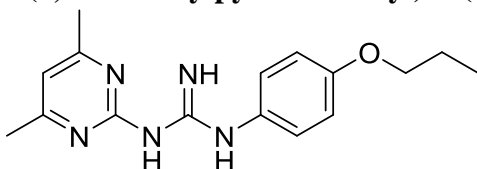

4-Propoxyaniline (307 mg, 2.03 mmol, 1.5 eq.) was added dropwise to a suspension of *N*-(4,6-dimethylpyrimidin-2-yl)cyanamide (200 mg, 1.35 mmol; 1.0 eq.) in anhydrous EtOH (4 ml). Solids were dissolved during addition of aniline. Reaction

mixture was heated to reflux. At this temperature reaction mixture was stirred for 72 h and monitored by TLC (eluent: MeOH). Then reaction mixture was cooled to -35 °C and solution of NaOH (10 ml, 10% w/w) was added dropwise. Solids were filtered and washed with Et<sub>2</sub>O (4 × 20 ml). Filtrate cake was dissolved in MeOH and purified by column chromatography on silica with MeOH as an eluent.

47% **yield**, white solid, **m.p.** = 191.5 °C, **R<sub>f</sub>** = 0.36 (MeOH, ninhydrine), **<sup>1</sup>H-NMR**: (400 MHz, Methanol-*d*<sub>4</sub>)  $\delta$  = 7.21 – 7.08 (m, 2H), 6.92 – 6.83 (m, 2H), 6.61 (s, 1H), 3.89 (t, *J* = 6.5 Hz, 2H), 3.27 (p, *J* = 1.6 Hz, 1H), 2.31 (s, 6H), 1.83 – 1.65 (m, 2H), 1.01 (t, *J* = 7.4 Hz, 3H) ppm, **<sup>13</sup>C-NMR**: (101 MHz, Methanol-*d*<sub>4</sub>)  $\delta$  = 168.6 (2C), 165.2, 158.1, 157.3, 133.7, 126.6 (2C), 116.4 (2C), 112.9, 70.9, 23.74 (2C), 23.69, 10.9 ppm, **IR** (KBr)  $\nu$  = 3312, 3106, 3088, 2959, 2893, 2869, 1631, 1577, 1527, 1509, 1419, 1383, 1344, 1237, 1171, 1117, 1075, 1048, 1024 cm<sup>-1</sup>, **HRMS** (ESI+) *m/z*: calcd. for C<sub>16</sub>H<sub>22</sub>N<sub>5</sub>O [M+?]<sup>+</sup>: 300.1824, found: 300.1773.

<sup>1</sup> WO2013/53726, 2013, A1.

## NMR spectra

### *N*-(4,6-Dimethylpyrimidin-2-yl)cyanamide

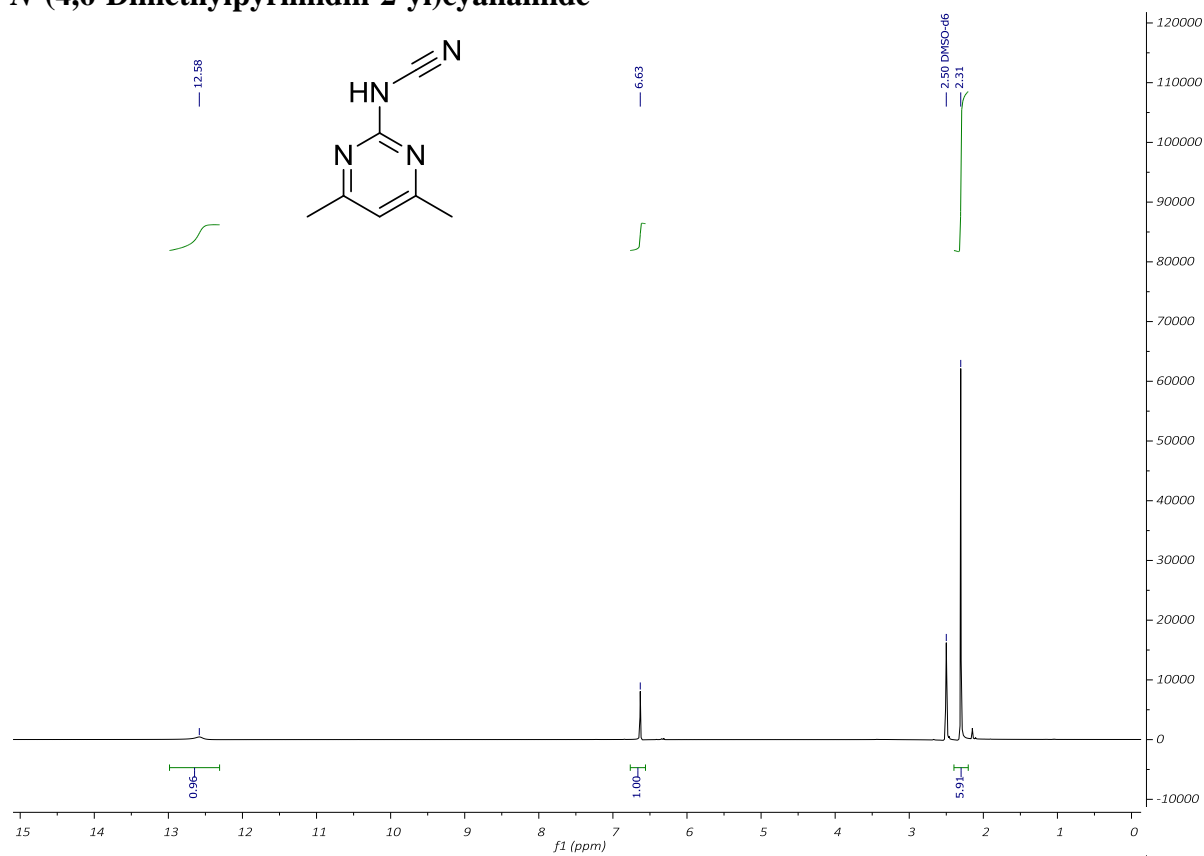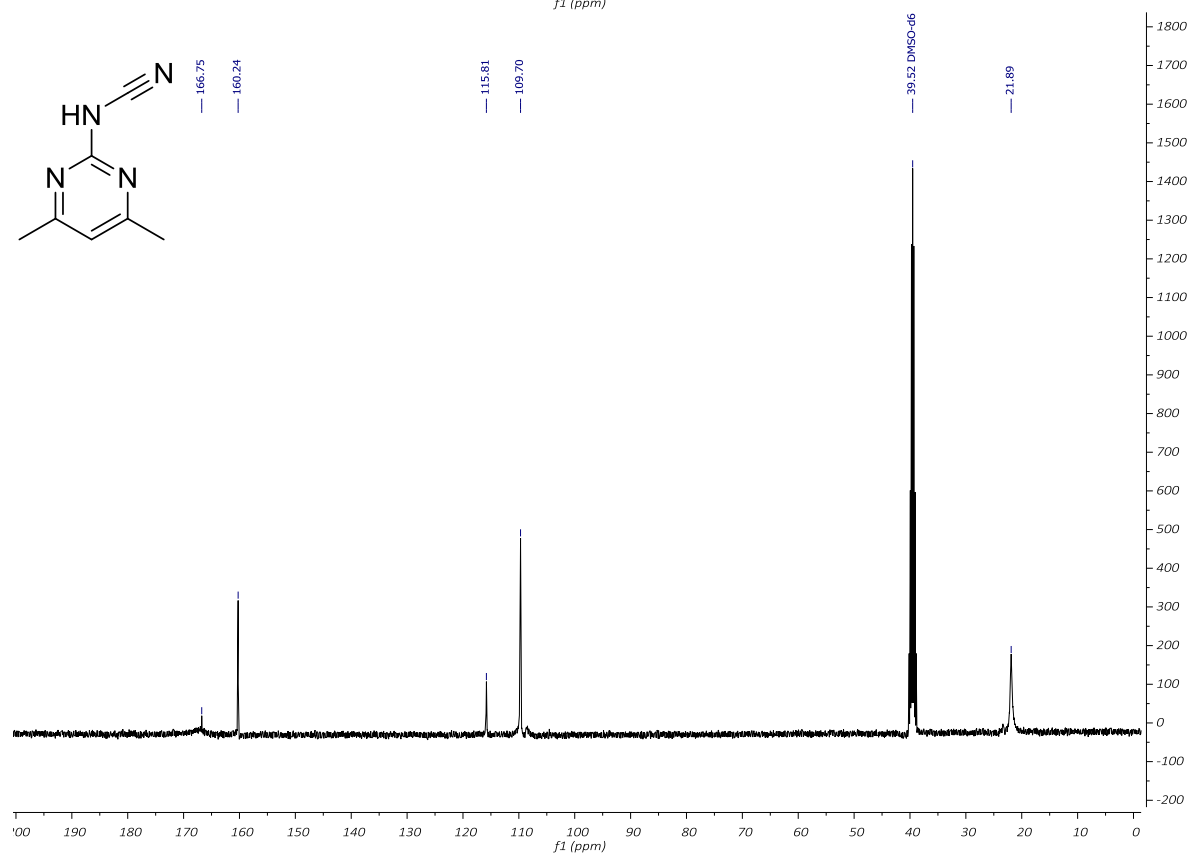

# DEPT-135

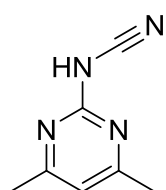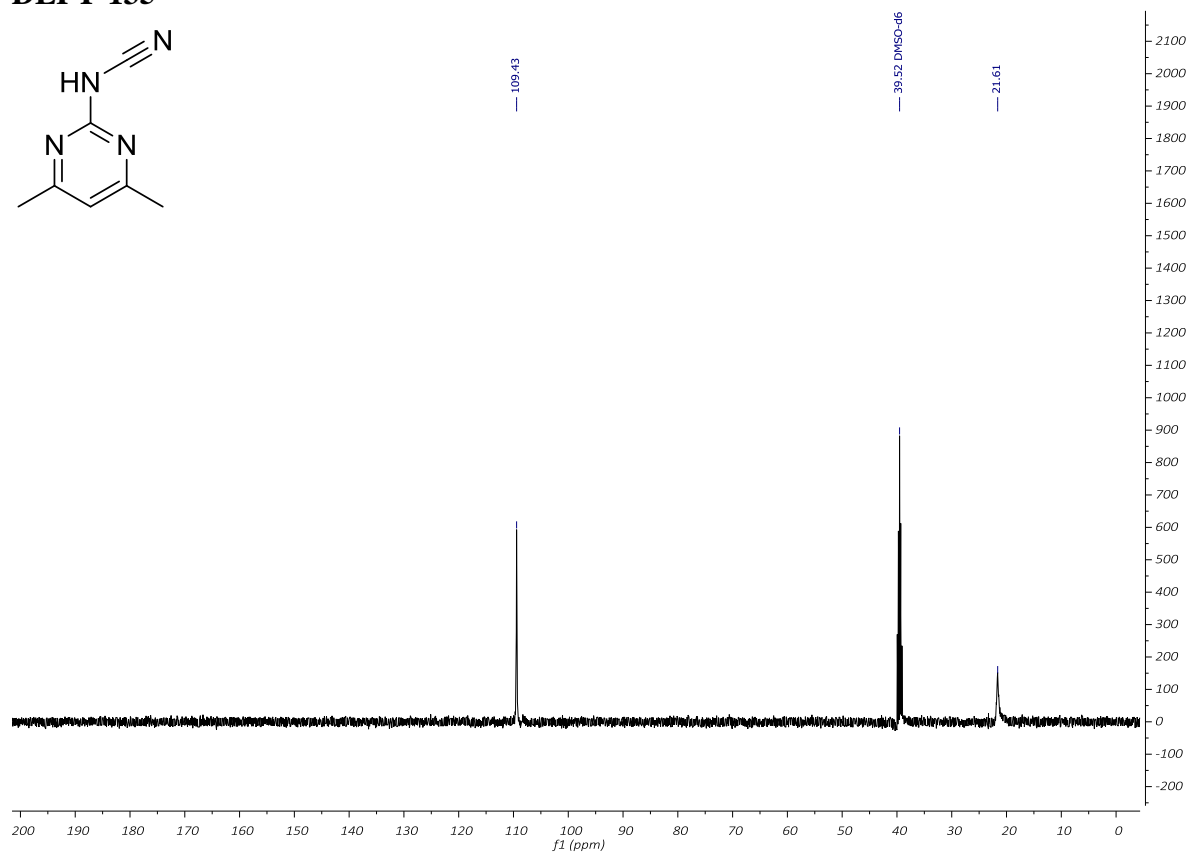

# COSY

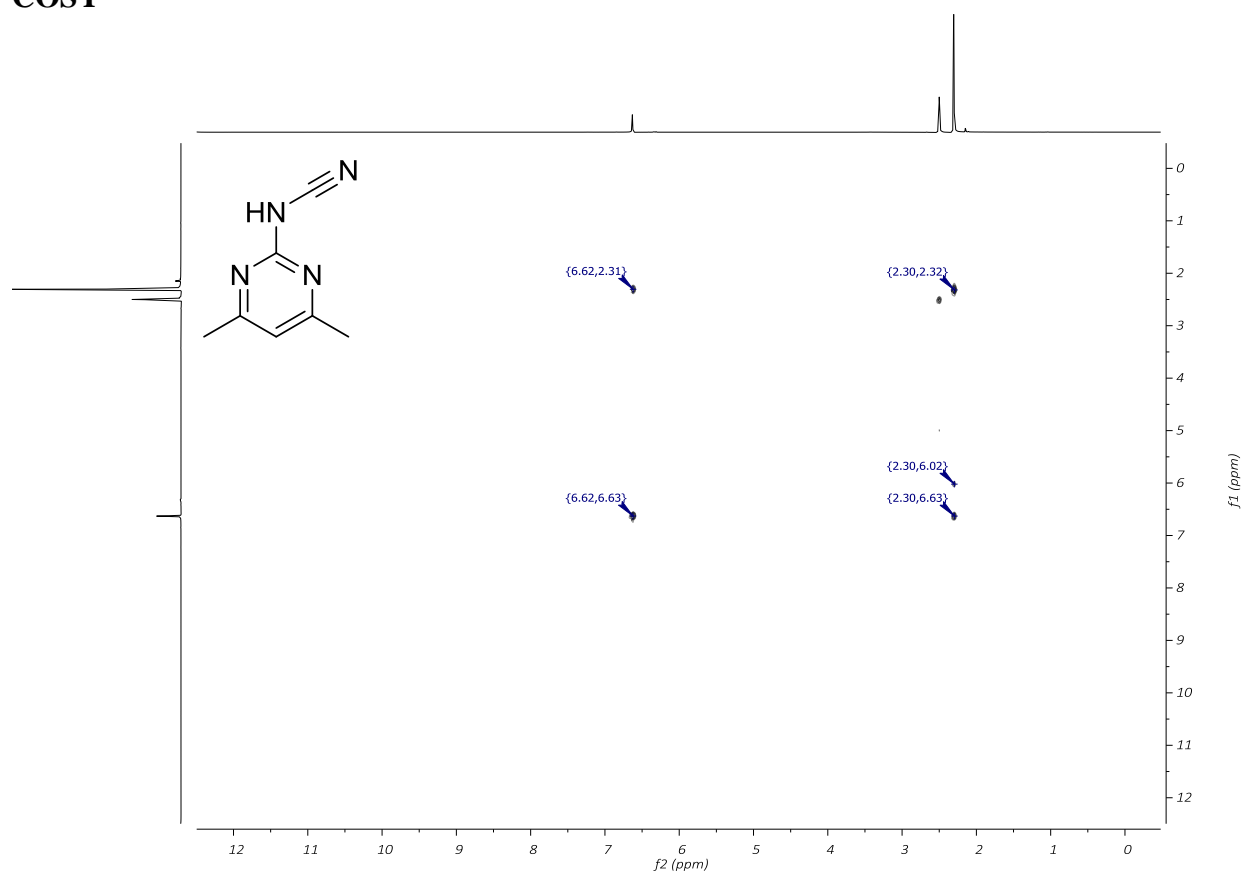

# HSQC

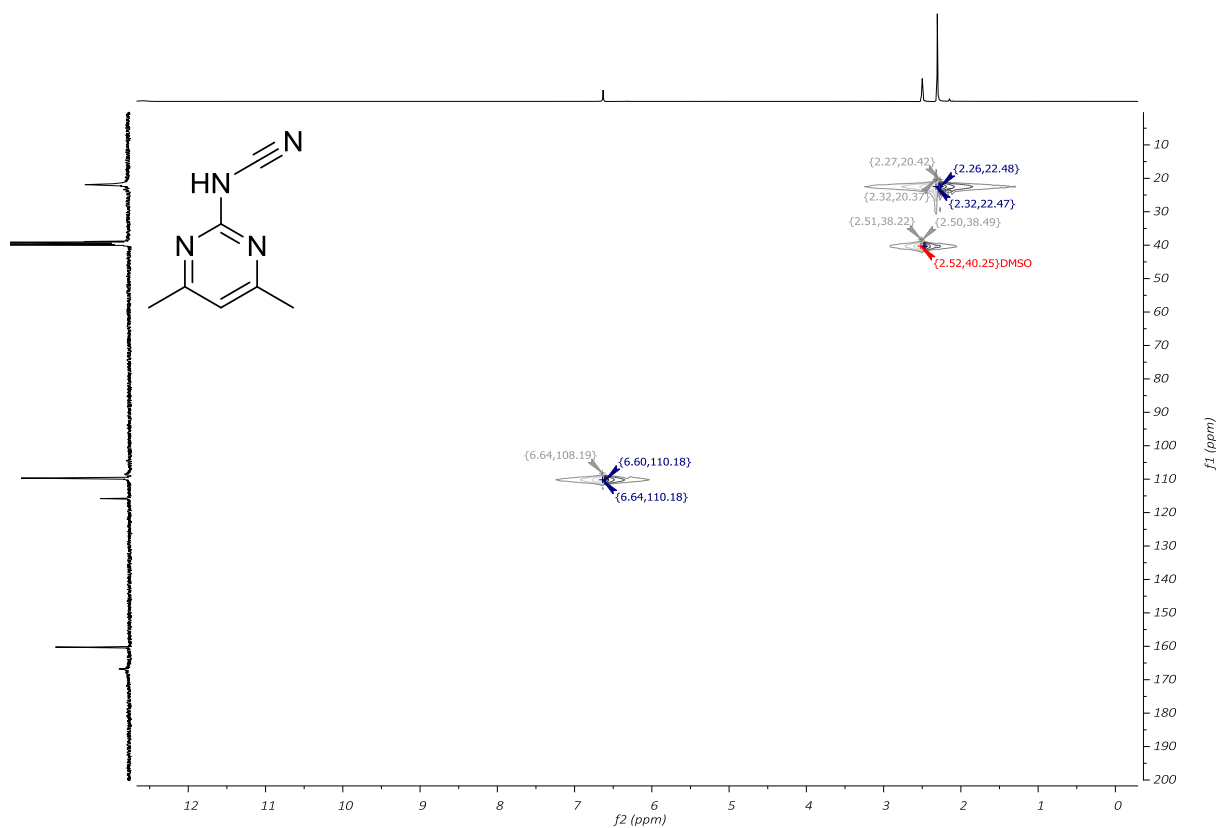

# HMBC

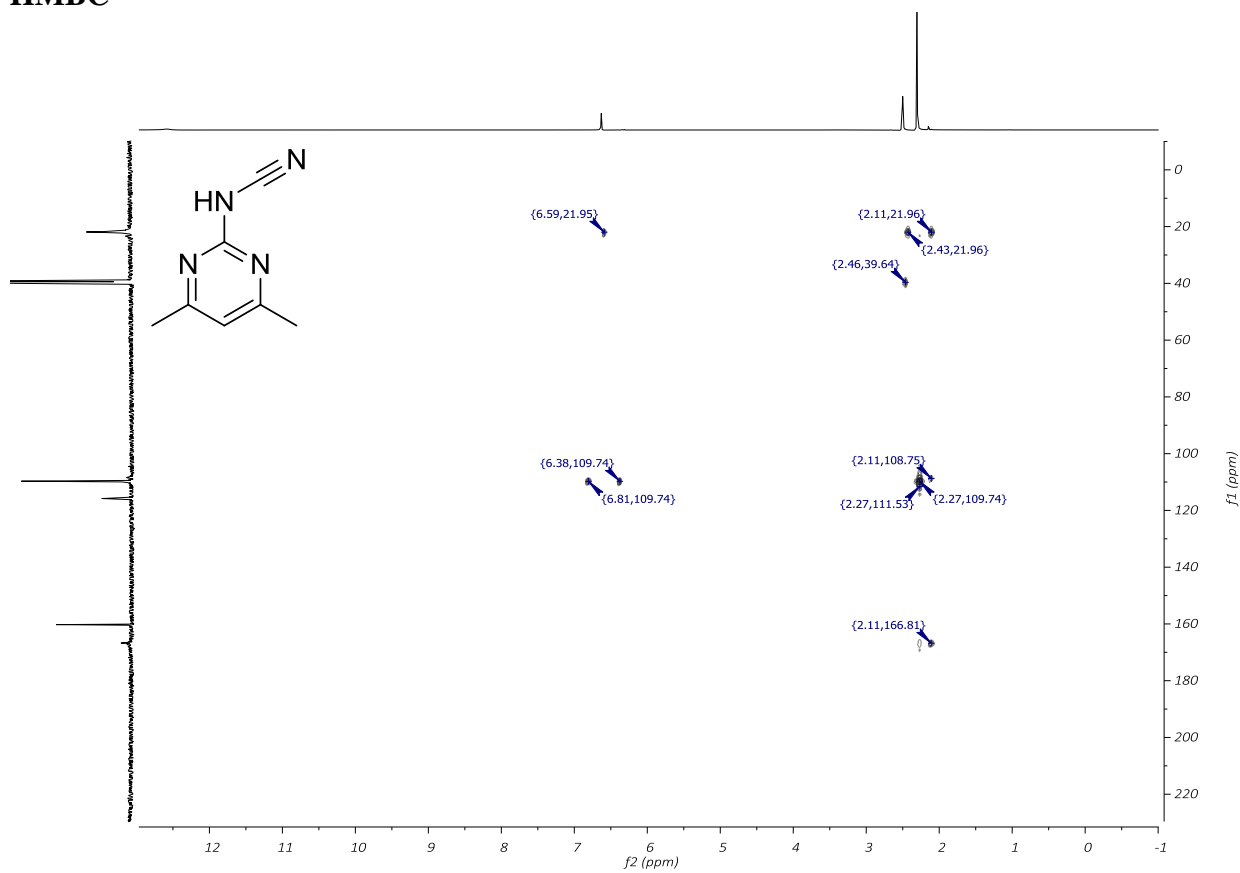

# 1-(4,6-Dimethylpyrimidin-2-yl)-3-(4-propoxyphenyl)guanidine

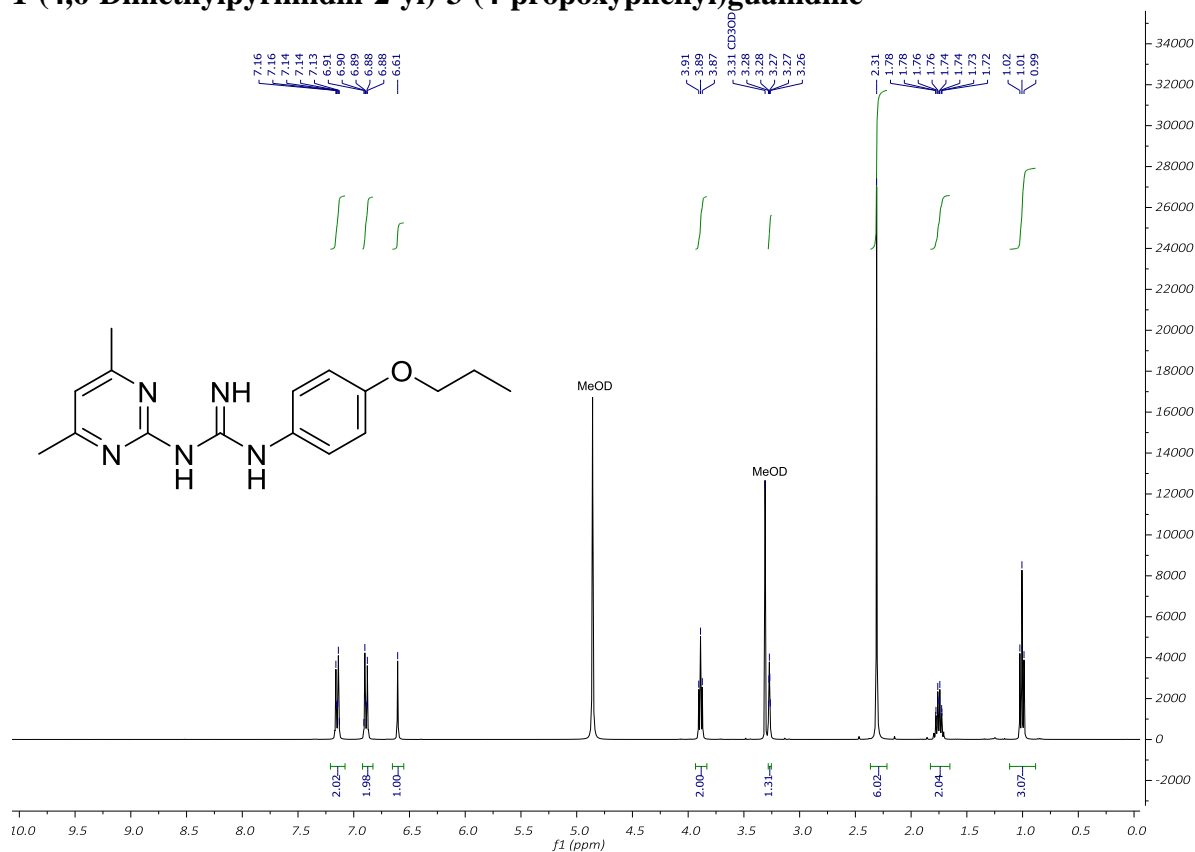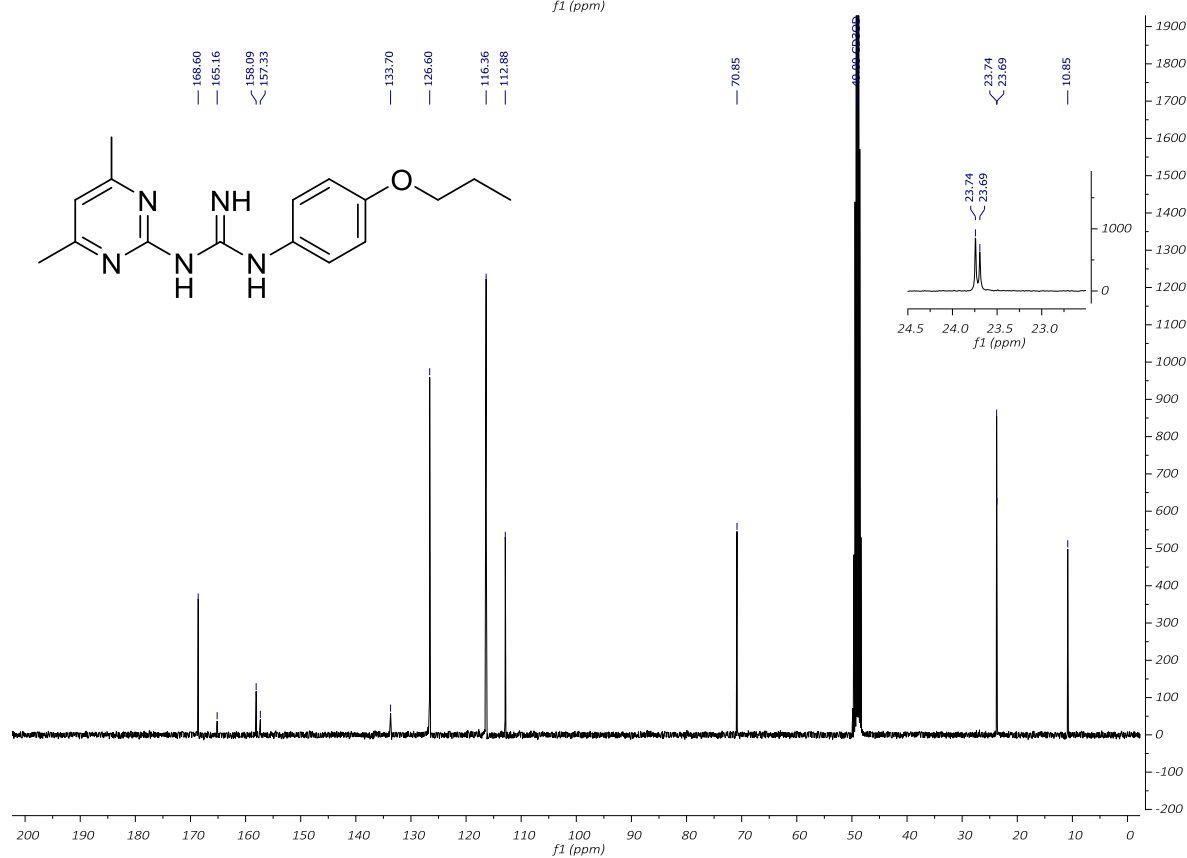

# DEPT-135

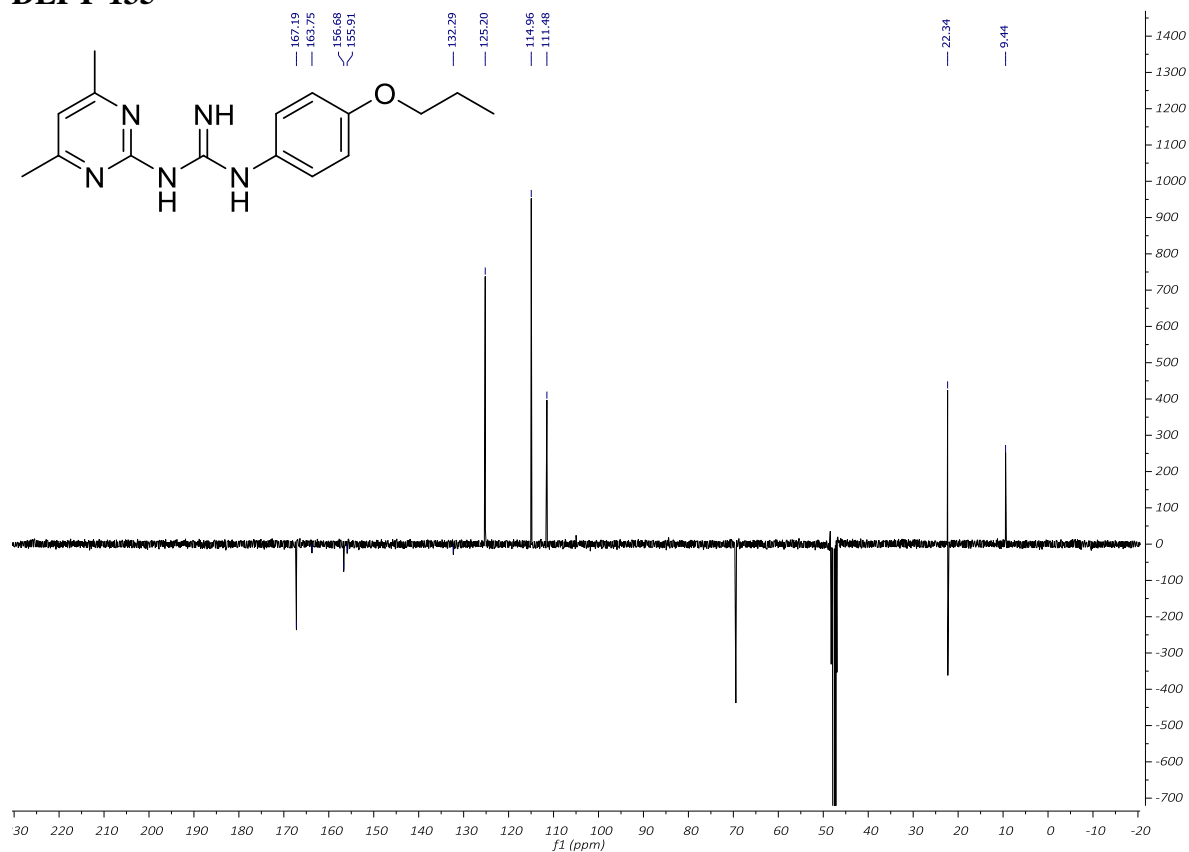

# COSY

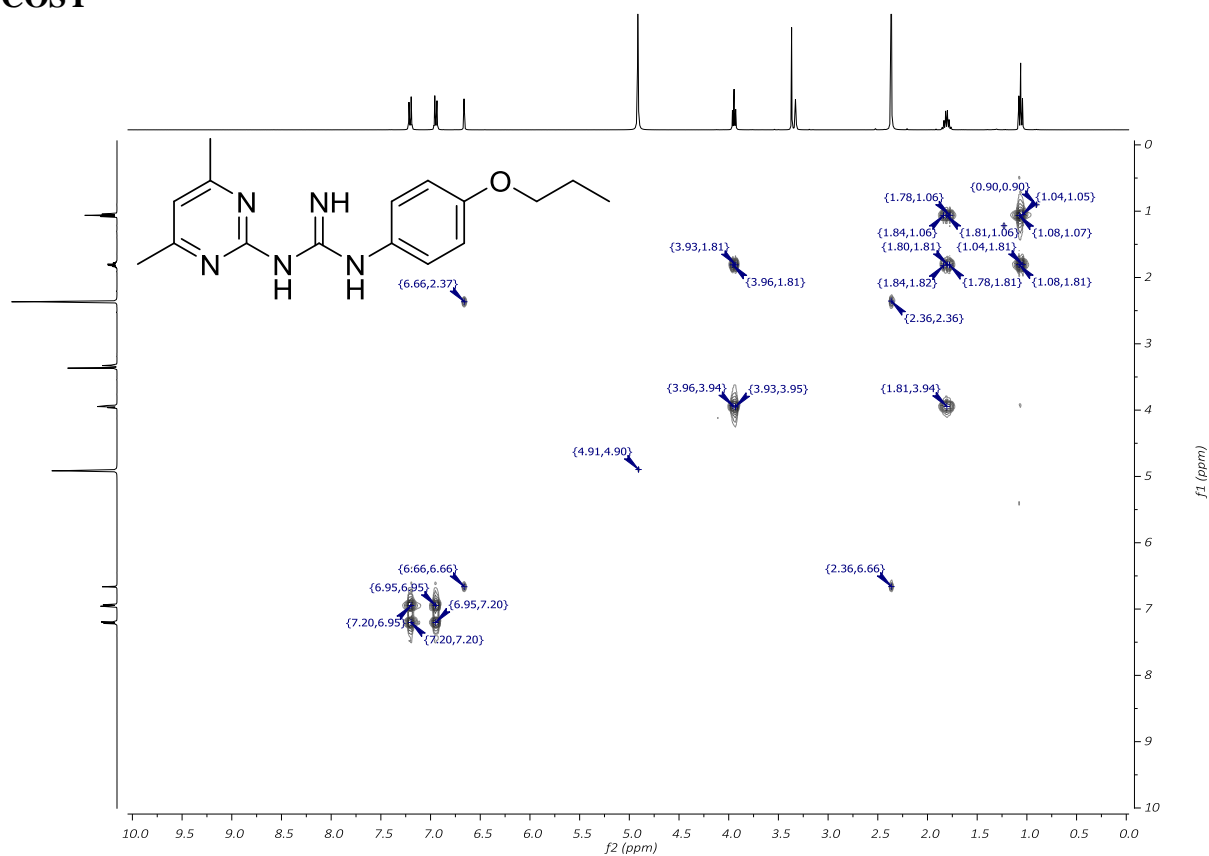

# HSQC

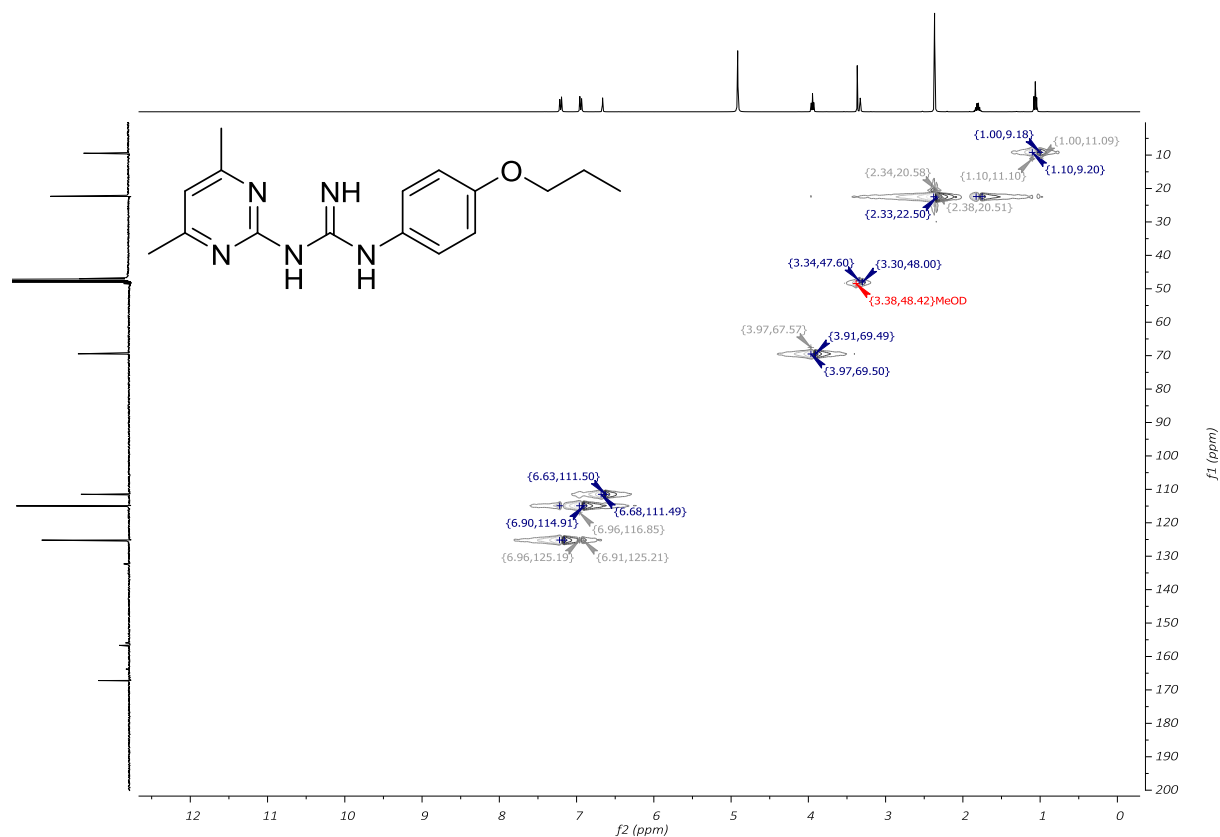

# HMBC

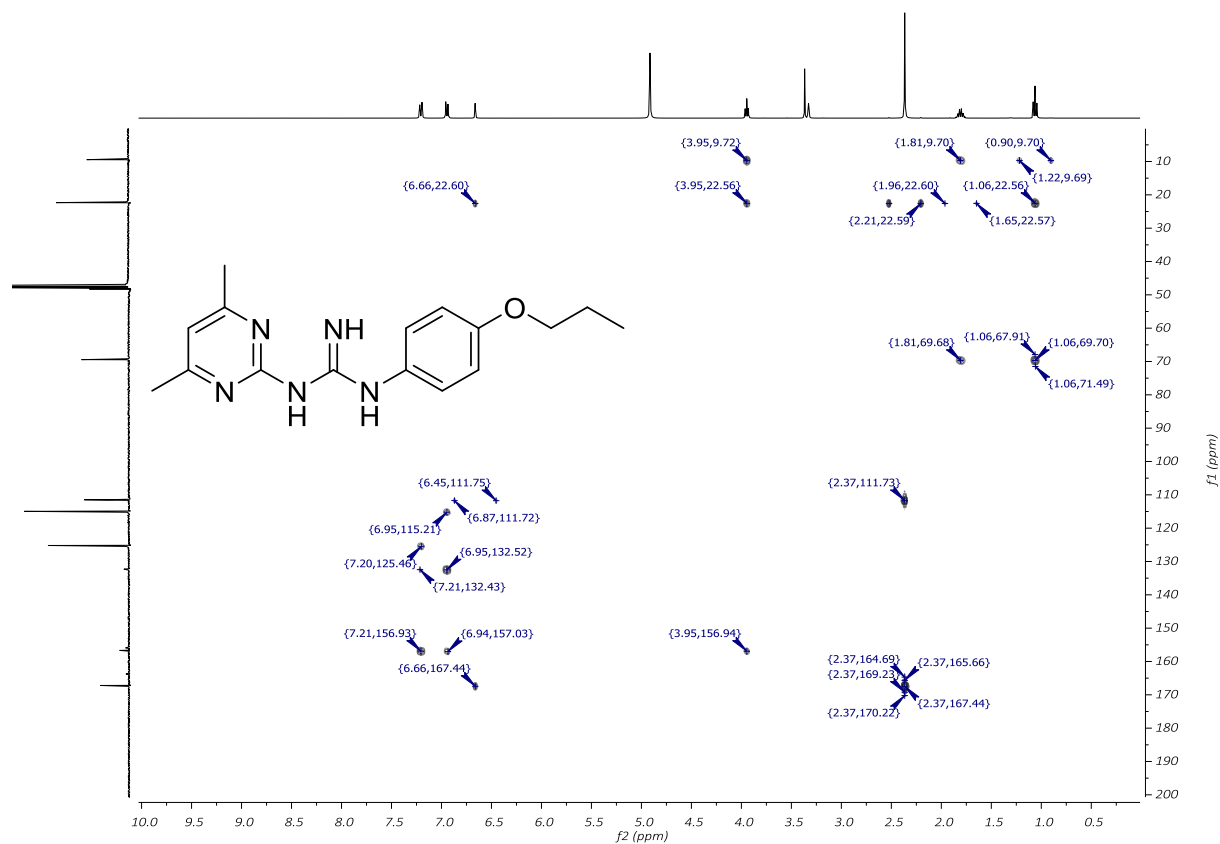

## Preparation of oxalate salt derived from S9

Corresponding oxalate salt derived from 1-(4,6-dimethylpyrimidin-2-yl)-3-(4-propoxyphenyl)guanidine was prepared according to previously reported procedure.<sup>2</sup>

Oxalate acid dihydrate (27.1 mg; 0.167 mmol; 1.0 eq.) was dissolved in distilled water (1.0 ml). To this solution was added 1-(4,6-dimethylpyrimidin-2-yl)-3-(4-propoxyphenyl) (20.0 mg, 0.167 mmol, 1.0 eq.). Reaction mixture was stirred for 24 h at room temperature. Water was evaporated. Resulting solid was used directly to further studies.

quantitative **yield**, white solid, **<sup>1</sup>H-NMR**: (400 MHz, DMSO-*d*<sub>6</sub>)  $\delta$  = 9.18 (s, 2H), 7.38 – 7.22 (m, 2H), 7.18 – 6.94 (m, 3H), 3.96 (t, *J* = 6.5 Hz, 2H), 2.42 (s, 6H), 1.74 (q, *J* = 7.0 Hz, 2H), 0.99 (t, *J* = 7.4 Hz, 3H) ppm, **<sup>13</sup>C-NMR**: (101 MHz, DMSO-*d*<sub>6</sub>)  $\delta$  = 168.1 (2C), 165.2, 157.9, 157.2, 154.1 (2C), 127.5 (2C), 126.7, 115.7 (2C), 115.5, 69.3, 23.4 (2C), 22.0, 10.5 ppm. 168.6 (2C), 165.2, 158.1, 157.3, 133.7, 126.6 (2C), 116.4 (2C), 112.9, 70.9, 23.74 (2C), 23.69, 10.9 ppm, **IR** (KBr)  $\nu$  = 3375, 3294, 3111, 2959, 2881, 1736, 1652, 1613, 1545, 1512, 1428, 1356, 1341, 1299, 1240, 1207, 1180, 1099, 1078, 1054, 1015 cm<sup>-1</sup>.

---

<sup>2</sup> Israel, M.; Zoll, E. C.; Muhammad, N.; Modest, E. *J. Med. Chem.* **1973**, *16*, 1-5.

# <sup>1</sup>H-NMR

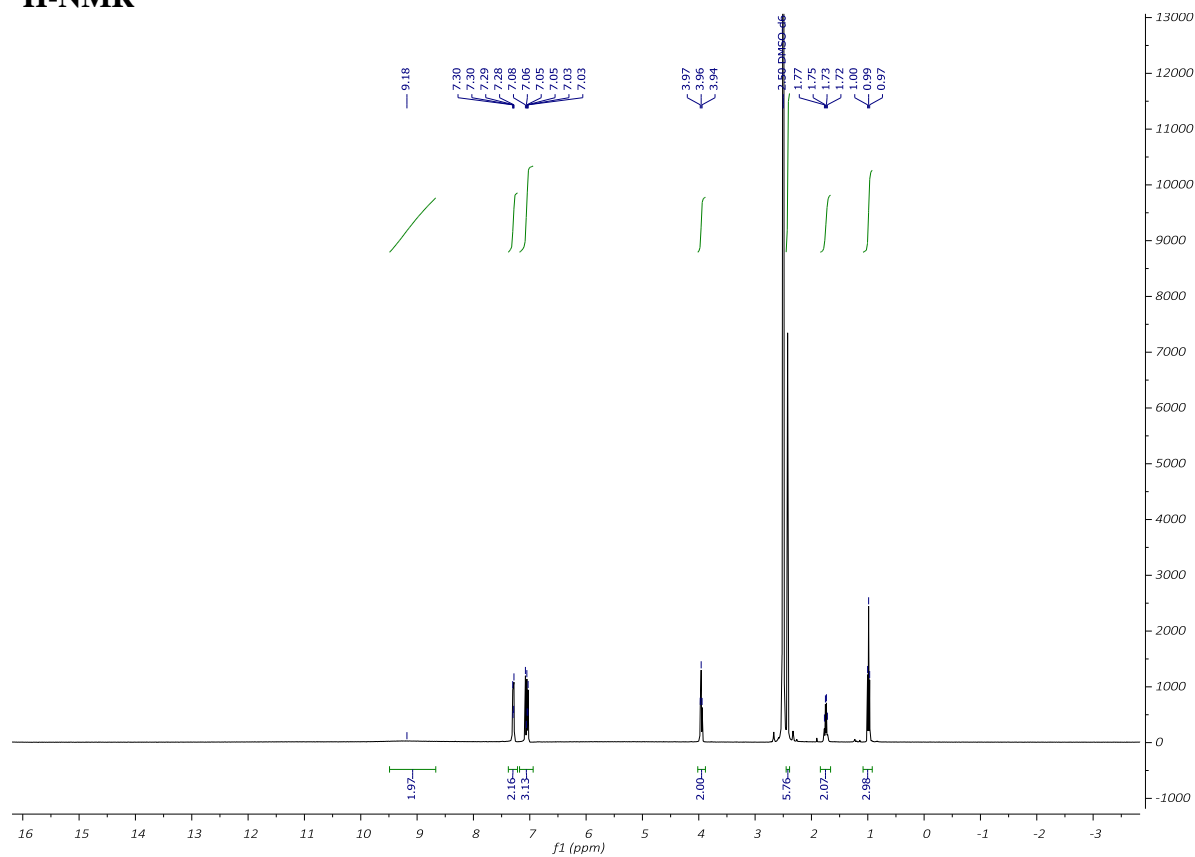

# <sup>13</sup>C-NMR

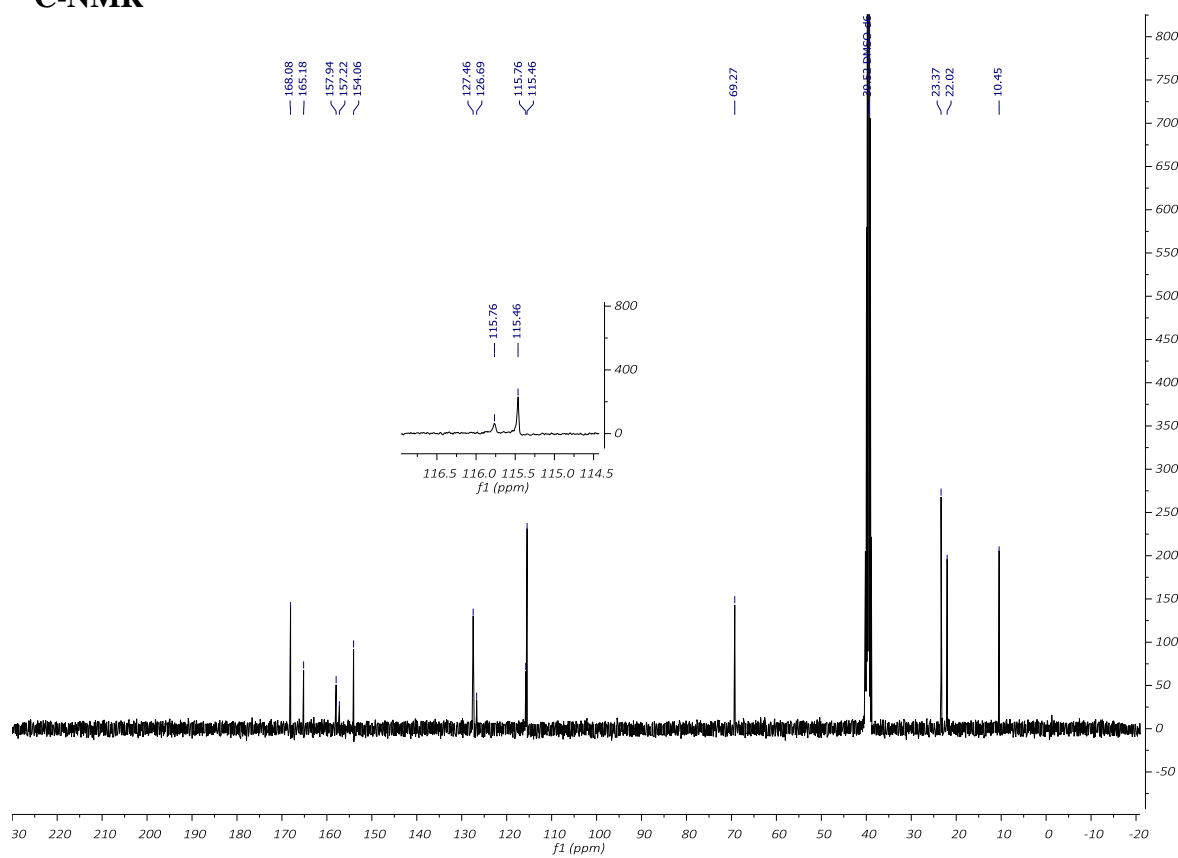

# DEPT-135

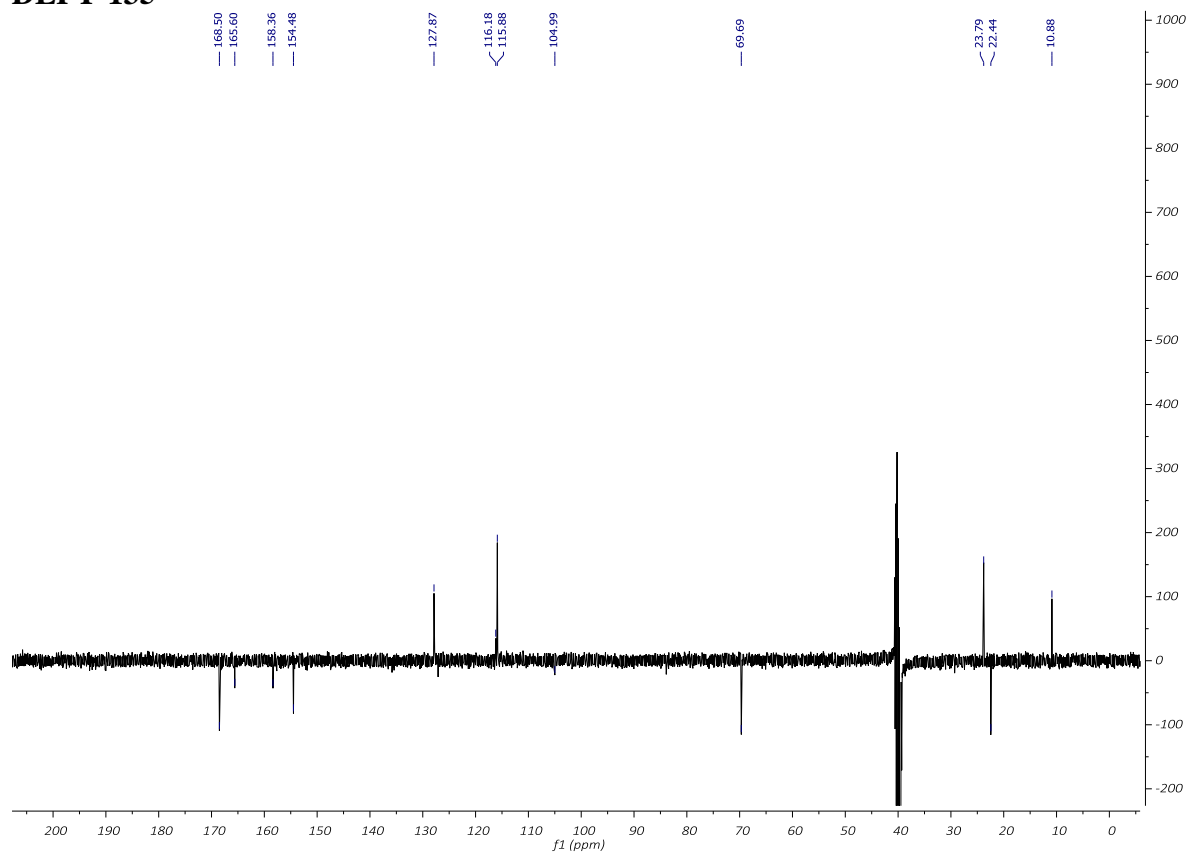

# COSY

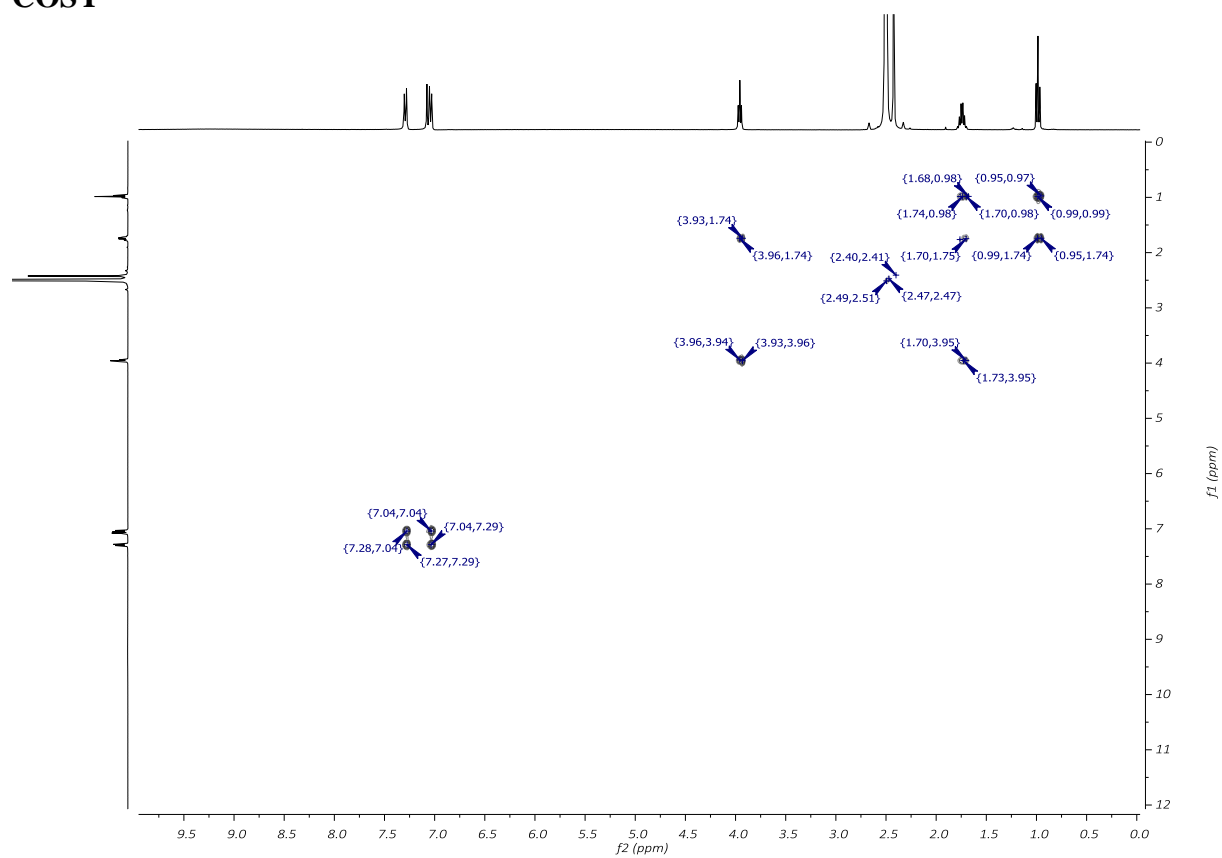

# HSQC

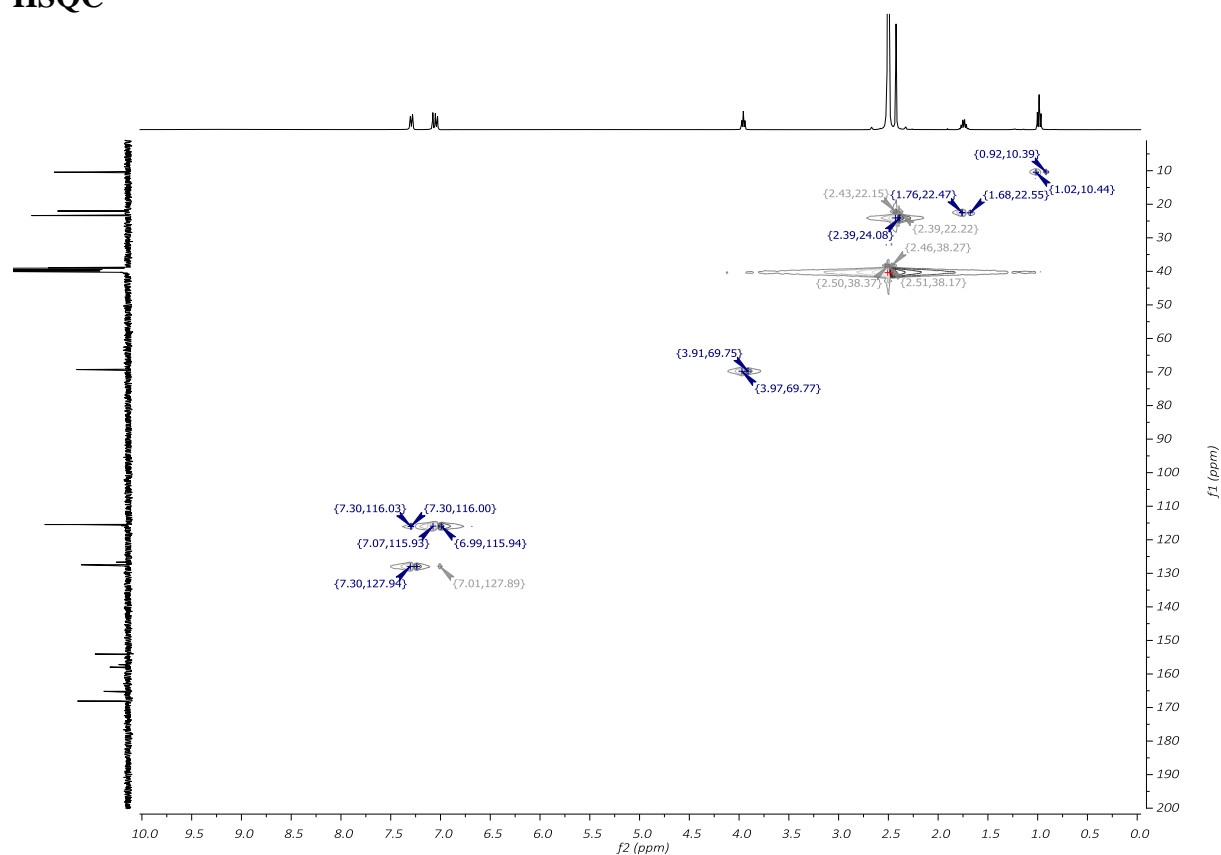

# HMBC

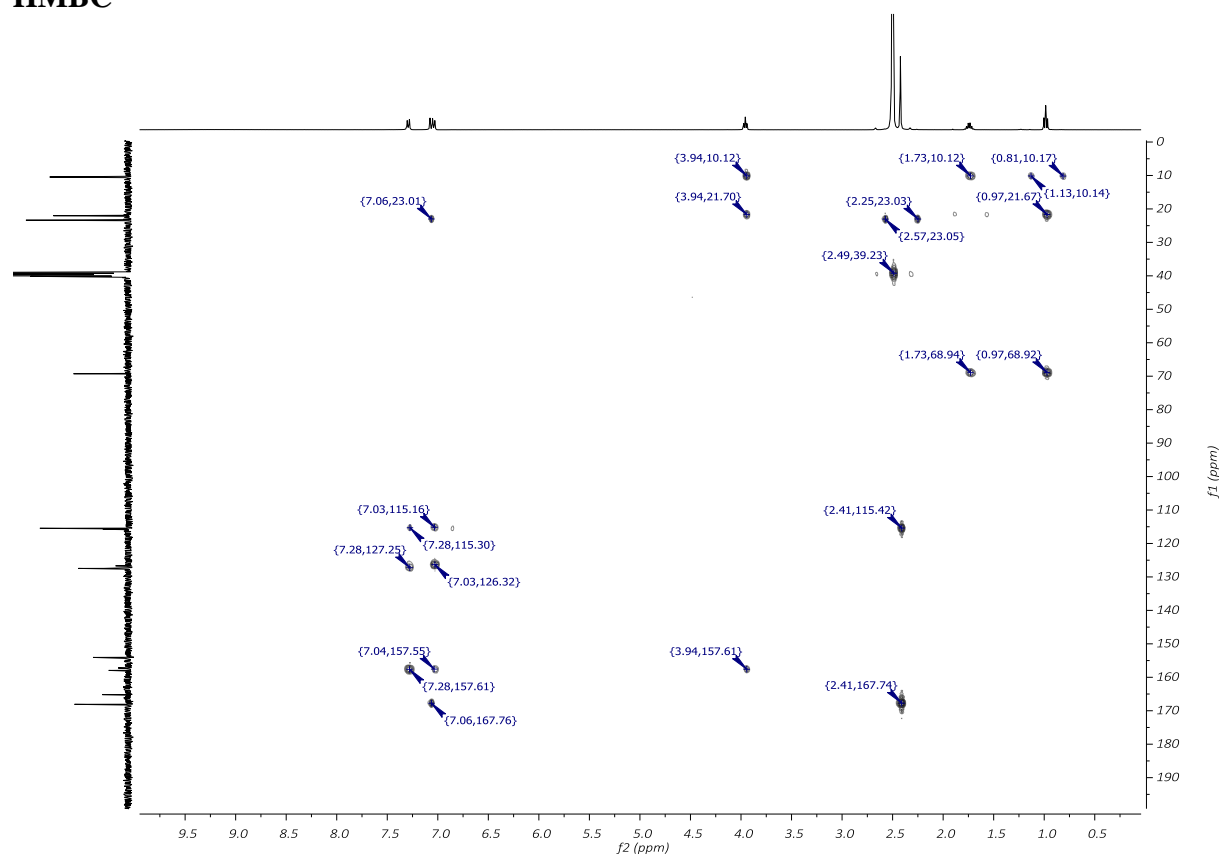

Supplement: supp [file elife-48876-supp-v2.zip › elife_poa_e48876_Supplementary_file_1.pdf]
