# Supplementary material for: Modulating FOXO3 transcriptional activity by small, DBD-binding molecules
Source: eLife journal article supplement (doi:10.7554/elife.48876), 2019-12-02
Supplement: supp [file elife-48876-supp-v1.zip]

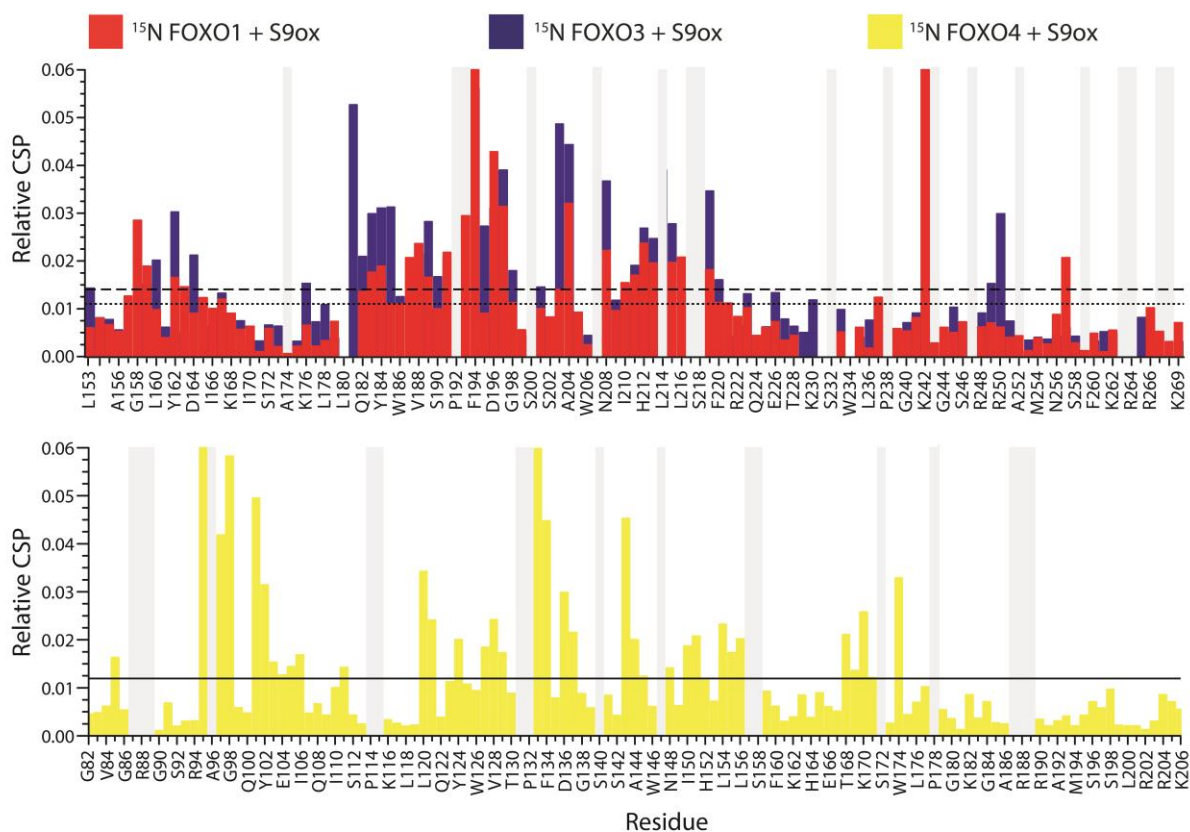

**Figure 2 – figure supplement 2: Comparison of S9OX binding to various FOXO proteins.** The comparison of chemical shift perturbation (CSP) obtained for 100  $\mu\text{M}$  FOXO1-DBD (red), FOXO3-DBD (blue) and FOXO4-DBD (yellow) in the presence of 3 mM S9OX. Lines indicate changes greater than the mean (FOXO1-DBD, dotted line, CSP > 0.011; FOXO3-DBD, dashed line, CSP > 0.014; FOXO4-DBD, solid line, CSP > 0.012). The relative CSPs were calculated as described in the legend of Figure 2. The regions of the protein backbone that could not be unambiguously assigned are highlighted in grey. The horizontal axis in the upper panel shows mouse FOXO1 sequence.
