# Supplementary material for: Modulating FOXO3 transcriptional activity by small, DBD-binding molecules
Source: eLife journal article supplement (doi:10.7554/elife.48876), 2019-12-02
Supplement: supp [file elife-48876-supp-v2.zip]

Archive with 7 entries (7 files):
- elife_poa_e48876_Supplementary_file_2.doc
- elife_poa_e48876_Transparent_Reporting_File.pdf
- elife_poa_e48876_Figure_2_figure_supplement_1.pdf
- elife_poa_e48876_Figure_1_figure_supplement_1.pdf
- elife_poa_e48876_Figure_1_figure_supplement_2.pdf
- elife_poa_e48876_Supplementary_file_1.pdf
- elife_poa_e48876_Figure_2_figure_supplement_2.pdf
