# Supplementary material for: Modulating FOXO3 transcriptional activity by small, DBD-binding molecules
Source: eLife journal article supplement (doi:10.7554/elife.48876), 2019-12-02
Supplement: supp [file elife-48876-supp-v2.zip › elife_poa_e48876_Figure_2_figure_supplement_1.pdf]

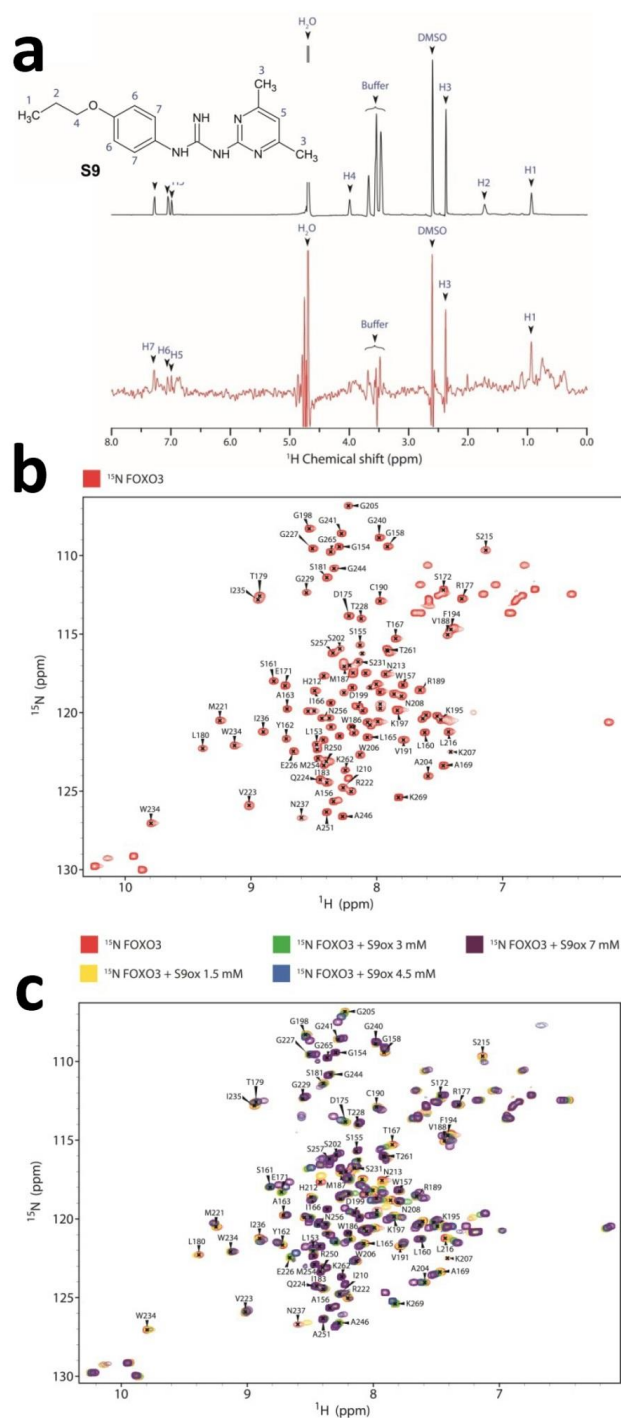

**Figure 2 – figure supplement 1: S9 binding to FOXO3-DBD.** (a) 1D  $^1\text{H}$  STD-NMR experiments for S9 compound in the presence of the  $15\ \mu\text{M}$  FOXO3-DBD. The reference spectrum of S9 is shown in black, the corresponding STD-NMR spectrum is shown in red. Chemically equivalent hydrogens in S9 molecule are numbered from 1 to 7. 10% dimethyl sulfoxide (DMSO) was added to the buffer to increase the S9 solubility. (b)  $^1\text{H}$ - $^{15}\text{N}$  HSQC spectrum of  $^{15}\text{N}$ -labeled FOXO3-DBD. (c)  $^1\text{H}$ - $^{15}\text{N}$  HSQC spectra of  $^{15}\text{N}$ -labeled FOXO3-DBD in the absence of S9ox (red) and in the presence of various concentrations of S9ox. The interaction induced both the change in signal positions or significant signal intensity reduction in the  $^1\text{H}$ - $^{15}\text{N}$  HSQC spectrum of FOXO3-DBD. (d) Representative binding isotherm used to calculate the dissociation constant of the interaction between FOXO3-DBD and S9ox.
